# Supplementary material for: A fibroblast-dependent TGF-β1/sFRP2 noncanonical Wnt signaling axis promotes epithelial metaplasia in idiopathic pulmonary fibrosis
Source: PubMed Central journal article supplement (PMC11405054; doi:10.1172/jci174598), 2024-07-09
Supplement: jci-134-174598-s221.pdf [file jci-134-174598-s221.pdf]

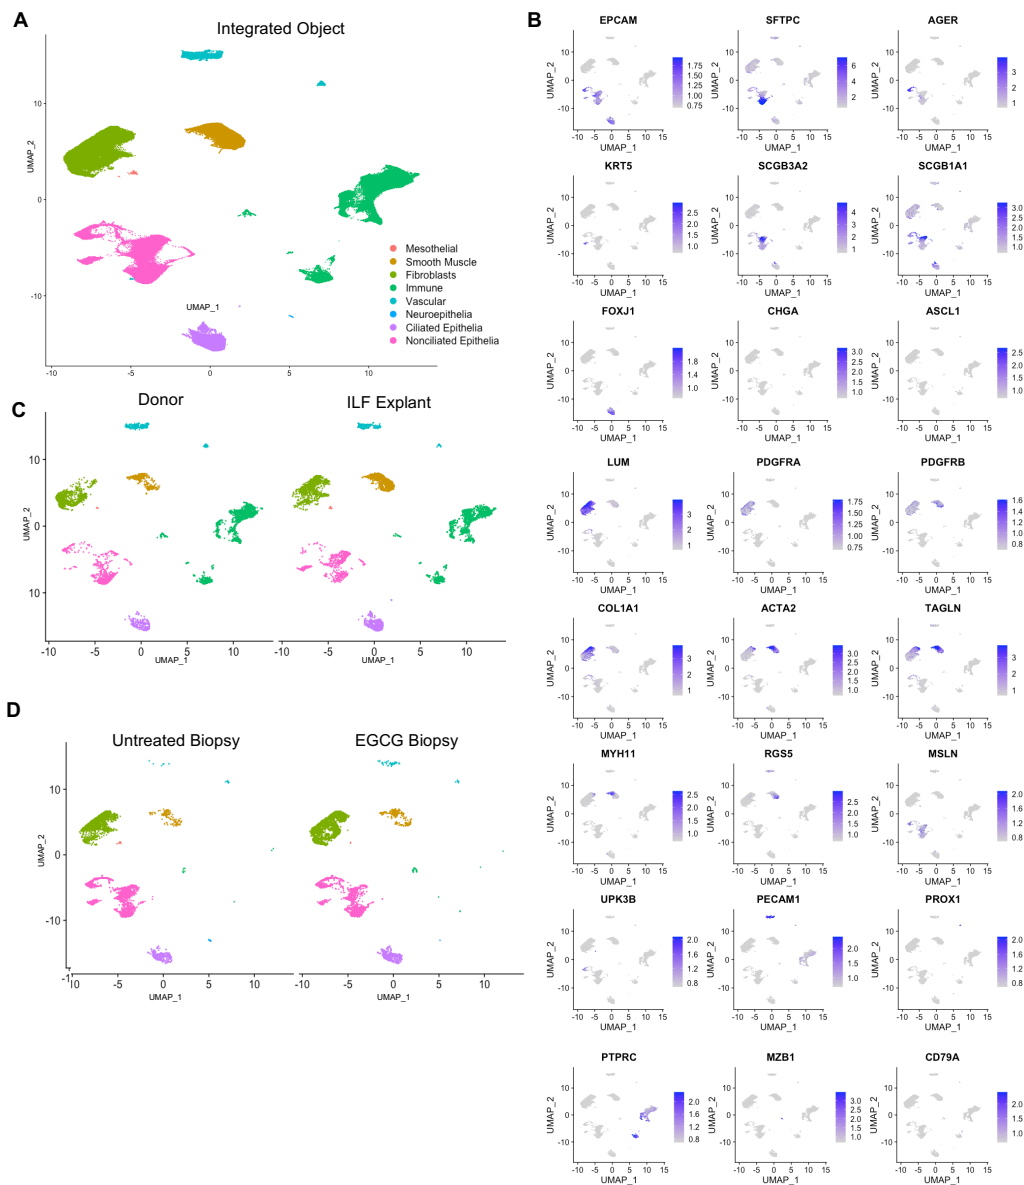

**Supplemental Figure 1: (A)** UMAP dimension plot, following integration of 48 different scRNA samples into a single Seurat object containing 232,513 cells, showing major annotated cell types, including mesothelial (754 cells), smooth muscle (27,596 cells), fibroblasts (55,242 cells),

immune (62,956 cells), vascular (13,167 cells), neuroepithelia (636 cells), ciliated epithelia (21,474 cells), and non-ciliated epithelia (50,688). **(B)** Cell type identification was based on canonical genes, with selected genes shown here. For example, Nonciliated epithelia express EPCAM, SFTPC, AGER, KRT5, SCGB3A2, SCGB1A1; Ciliated epithelia express EPCAM, FOXJ1; Neuroendocrine cells express CHGA and ASCL1; Fibroblasts express LUM, PDGFRA, COL1A1; Smooth Muscle express PDGFRB, ACTA2, TAGLN, MYH11, RGS5; Mesothelia express MSLN, UPK3B; Vascular Cells express PECAM1 and PROX1; and Immune Cells express PTPRC, MZB1, CD79A. **(C, D)** UMAP dimension plot with 5,000 randomly selected cells per sample type, with sample cell type annotation coloring as in (A).

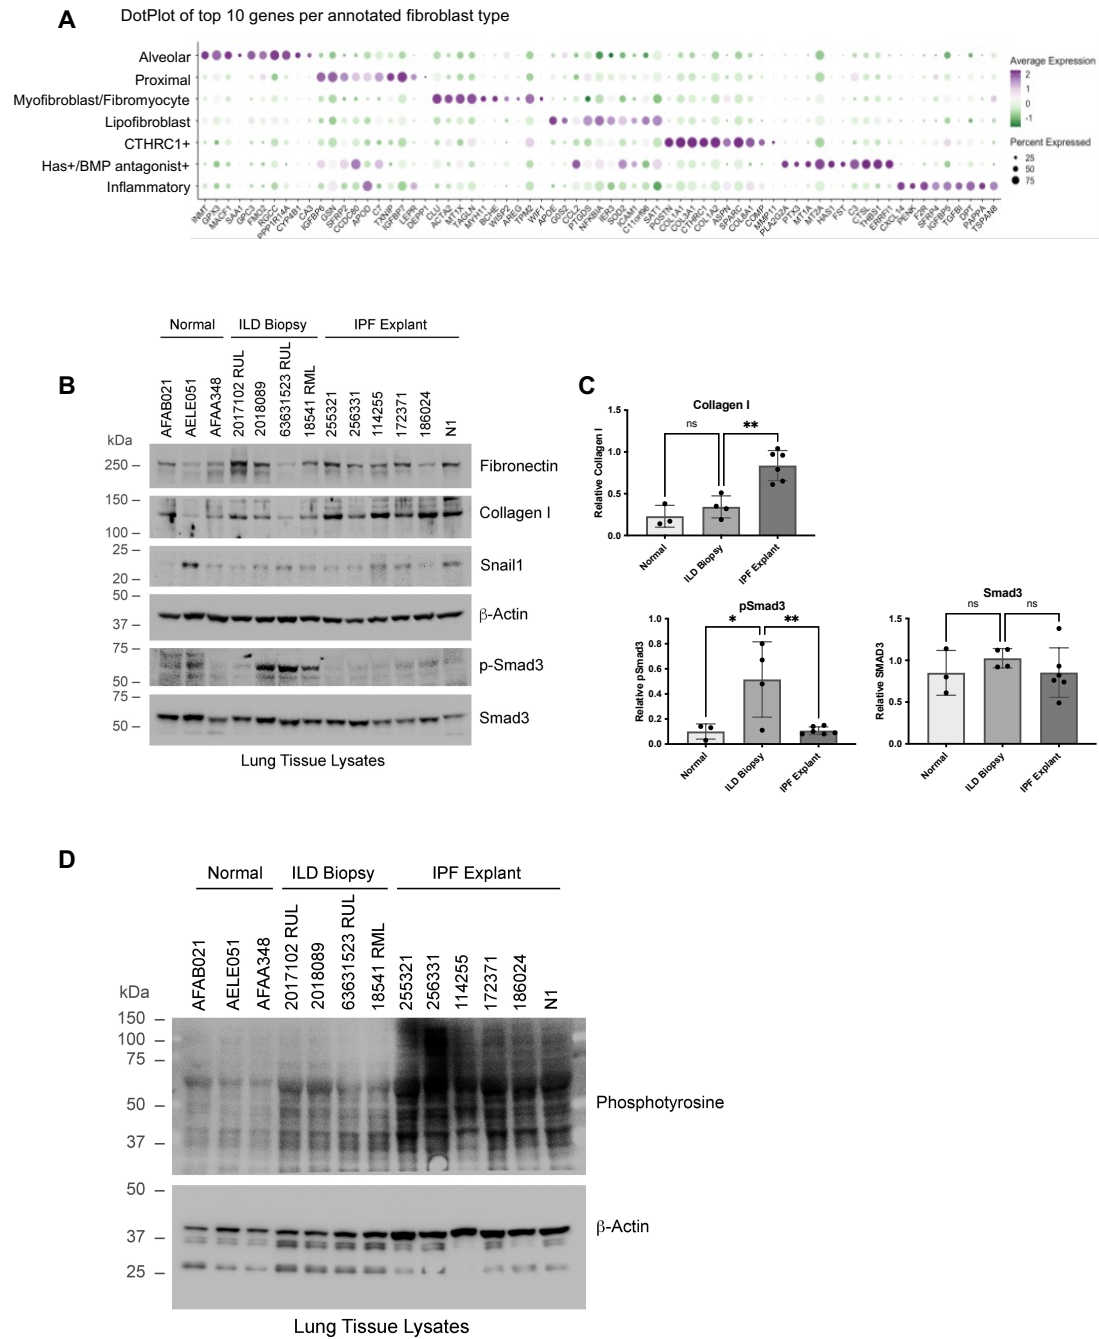

**Supplemental Figure 2. (A)** Dot Plot of top subtype-specific genes in fibroblast subtypes. **(B-C)** Western Blot of lysates from donor (n= 3), untreated biopsy (n=4), and IPF explants (n=6) showing highest pSmad3 expression in untreated biopsies. **(C)** Quantification of collagen I,

pSmad3, and Smad3 expression. **(D)** Western Blot of lysates from donor, control biopsy, and explant lungs with a pan-phosphotyrosine antibody. Statistical significance was determined by One-way ANOVA followed by Dunnett's test.

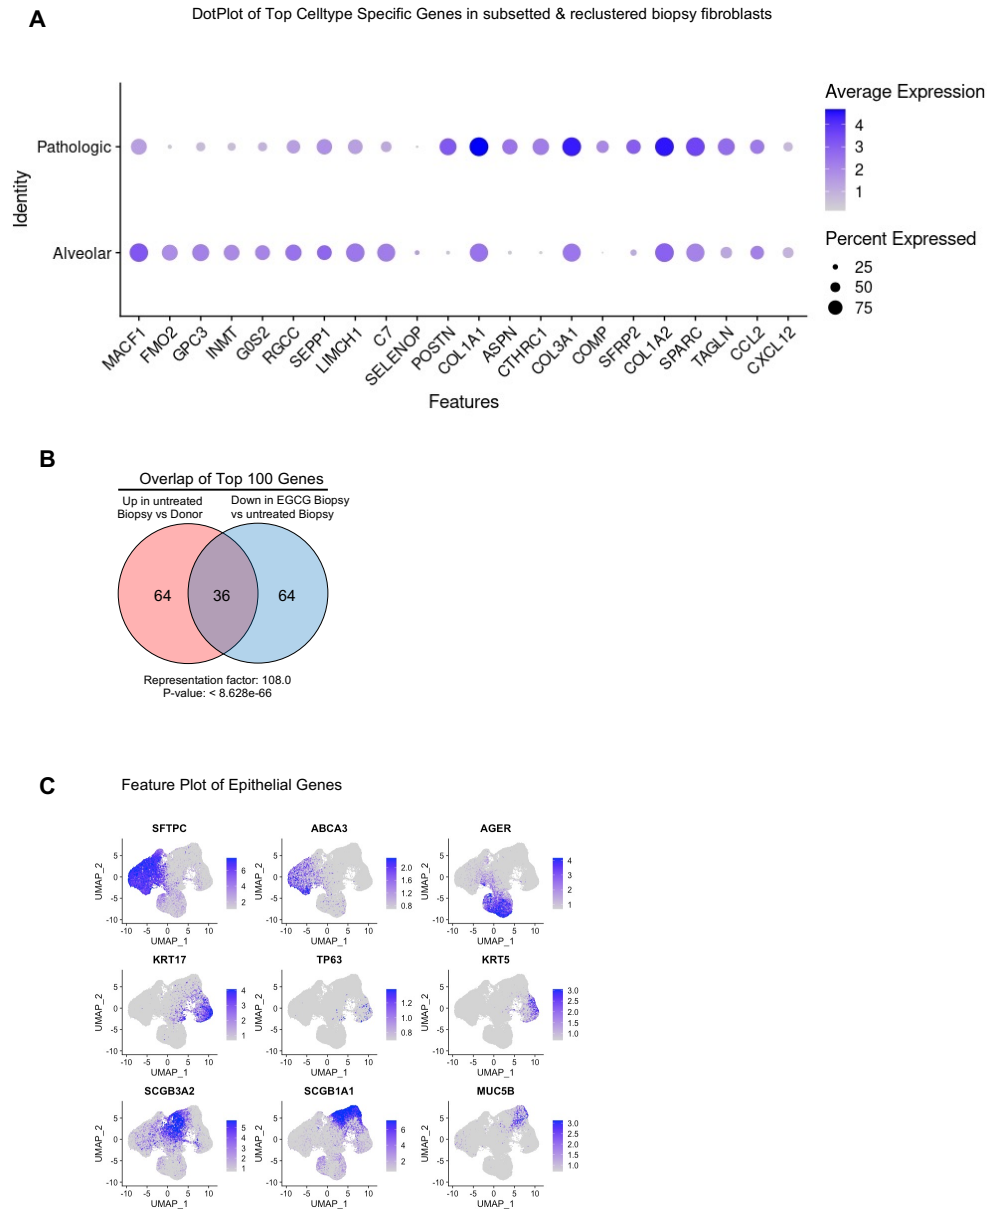

**Supplemental Figure 3. (A)** Feature Plot of selected fibrosis-related genes in subsetted & reclustered fibroblasts from untreated biopsy and EGCG biopsy. **(B)** Overlap between the 100 most upregulated genes in the untreated biopsy vs non-diseased donor D.E. list and the 100 most downregulated genes in the EGCG biopsy vs untreated biopsy D.E. list. Statistical analysis indicates the overlap is highly significant (non-random), confirming a role for TGF $\beta$ 1 signaling in the disease process. **(C)** Feature Plot of epithelial cell type specific genes, used for annotation in Figure 3E.

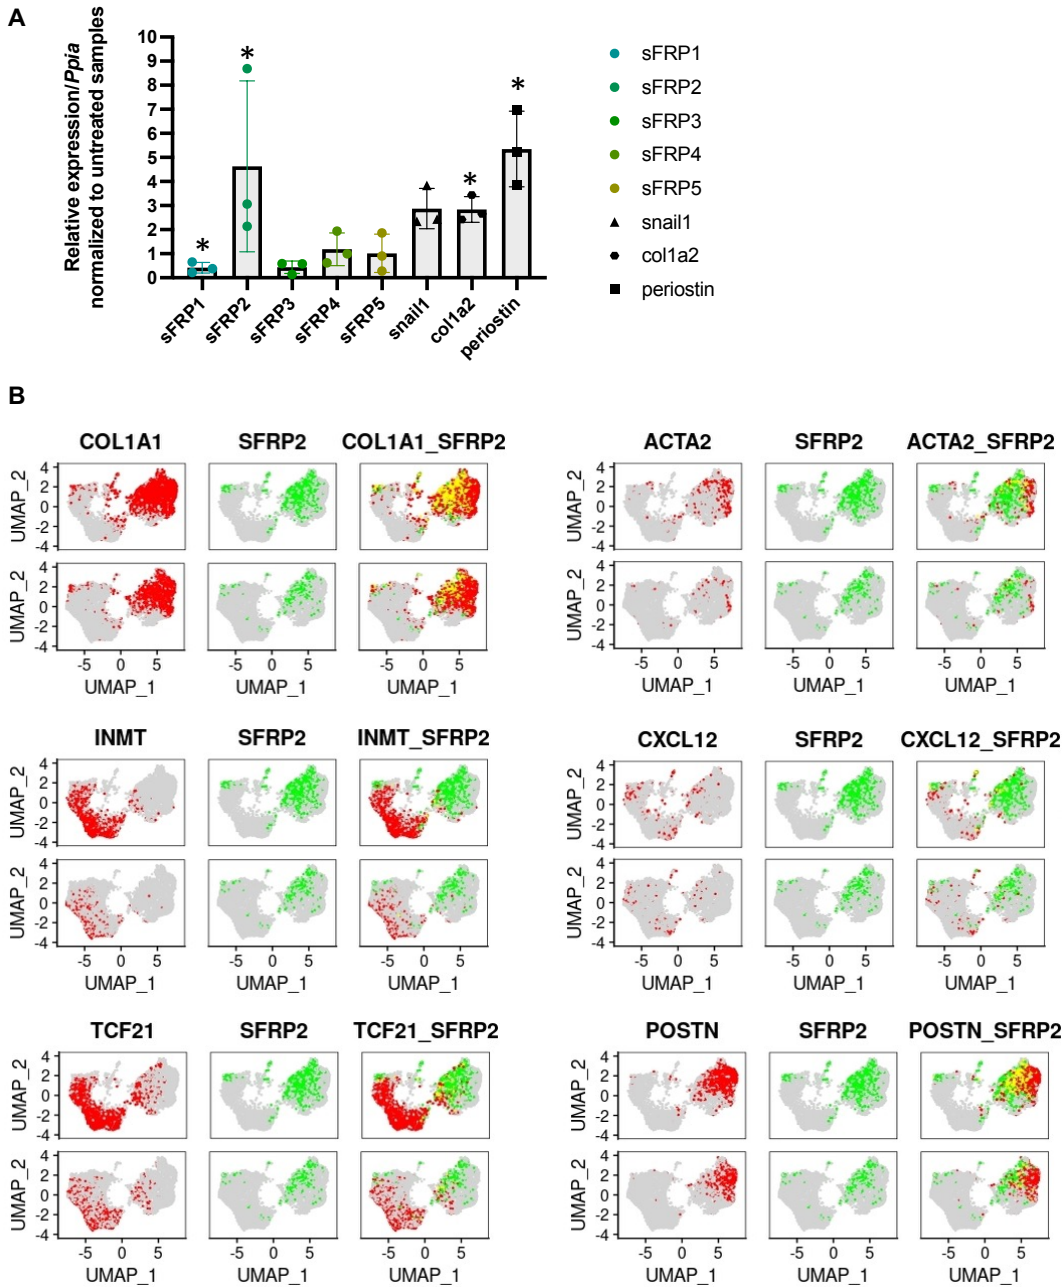

**Supplemental Figure 4. (A)** Relative RNA expression of five members of the sFRP family (*sfrp1*, *sfrp2*, *sfrp3*, *sfrp4*, and *sfrp5*) and known TGF- $\beta$ 1 target genes (*snail1*, *col1a2*, *periostin*) in human fibroblasts treated with TGF $\beta$ 1 (1 ng.ml<sup>-1</sup>) for 48 h (n=3). Statistical significance was determined by 2-tailed t-test. **(B)** Feature plots of *sfrp2* gene expression (green) in various fibroblast subsets characterized by *col1a1*, *acta2*, *inmt*, *cxcl12*, *tcf21*, and *periostin* (*postn*) gene expression (red). Cells expressing both *sfrp2* and marker gene are indicated in yellow.

## Localization of *sfrp2*<sup>+</sup> cells in untreated biopsy

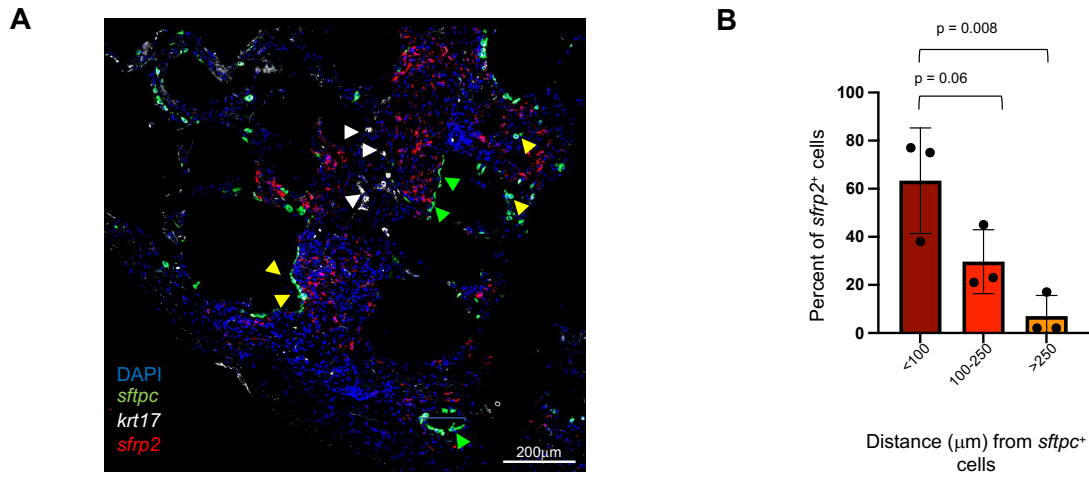

## IPF PCLS lysates treated +/- EGCG for 5 days

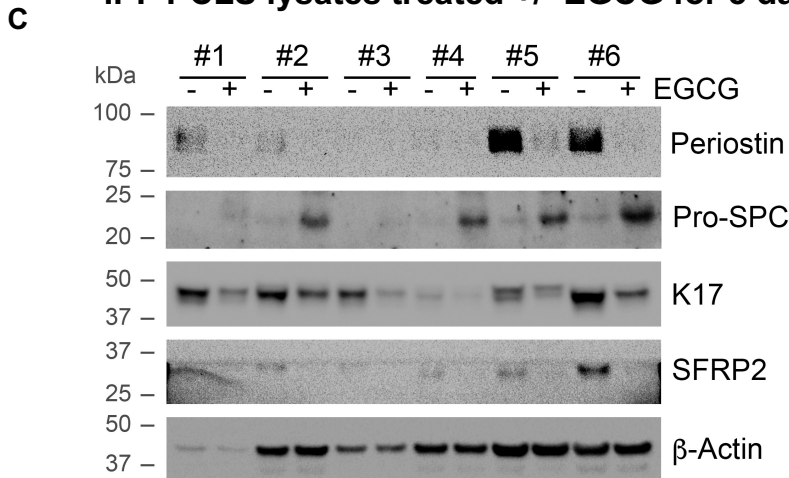

**Supplemental Figure 5. (A)** RNA *in situ* hybridization for *sfrtpc*, *krt17* and *sfrp2* on an IPF biopsy sample, with green arrowheads indicating *sfrtpc*<sup>+</sup>/*krt17*<sup>-</sup> cells, yellow arrowheads indicating *sfrtpc*<sup>+</sup>/*krt17*<sup>+</sup> cells, and white arrowheads indicating *sfrtpc*<sup>-</sup>/*krt17*<sup>+</sup> cells. Representative image of n=3 samples. Magnification x100. **(B)** Quantification of proximity of *sfrp2*<sup>+</sup> cells to *sfrtpc*<sup>+</sup> cells. Statistical significance was determined by One-way ANOVA tests followed by Dunnett's multiple comparisons test. Full panel for Western Blot analysis of lysates from precision-cut lung slices from IPF lung donors cultured for 7 days with EGCG (1mM).

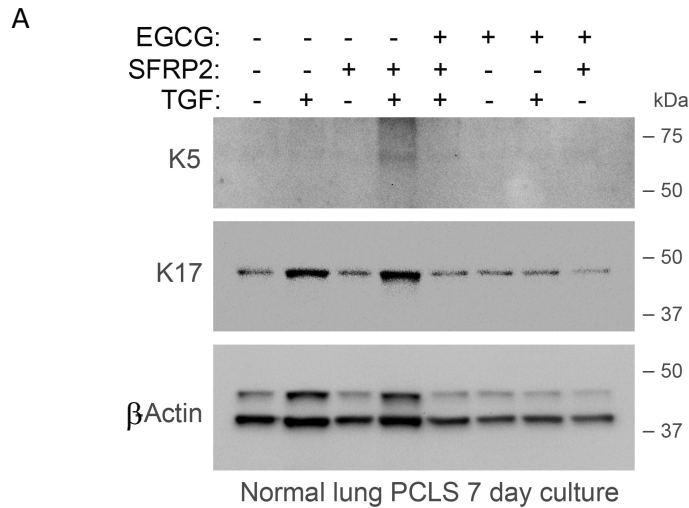

**B** Quantification for the expression of Krt 5 and Krt 17 in PCLS treated with TGF- $\beta$ 1/sFRP2/EGCG

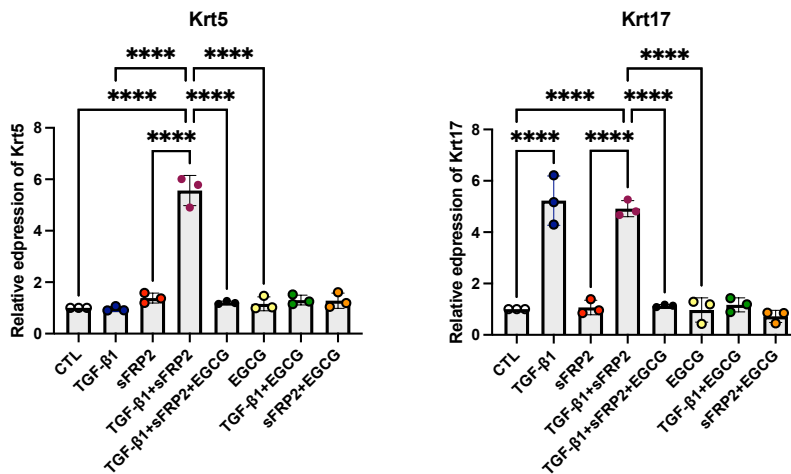

**Supplemental Figure 6. (A)** Full panel for Western Blot analysis of lysates from precision-cut lung slices from non-diseased lung donors cultured for 7 days with +/- TGF $\beta$ 1 (2 ng.ml<sup>-1</sup>) +/- sFRP2 (60 ng.ml<sup>-1</sup>) +/- EGCG (1uM) for 7 days. Lysates were blotted for KRT5 and KRT17. n= 3 biological replicates. **(B)** Graphical representation of the level of expression of KRT5 and KRT17. Statistical significance was determined by One-way ANOVA tests followed by Dunnett's multiple comparisons test.



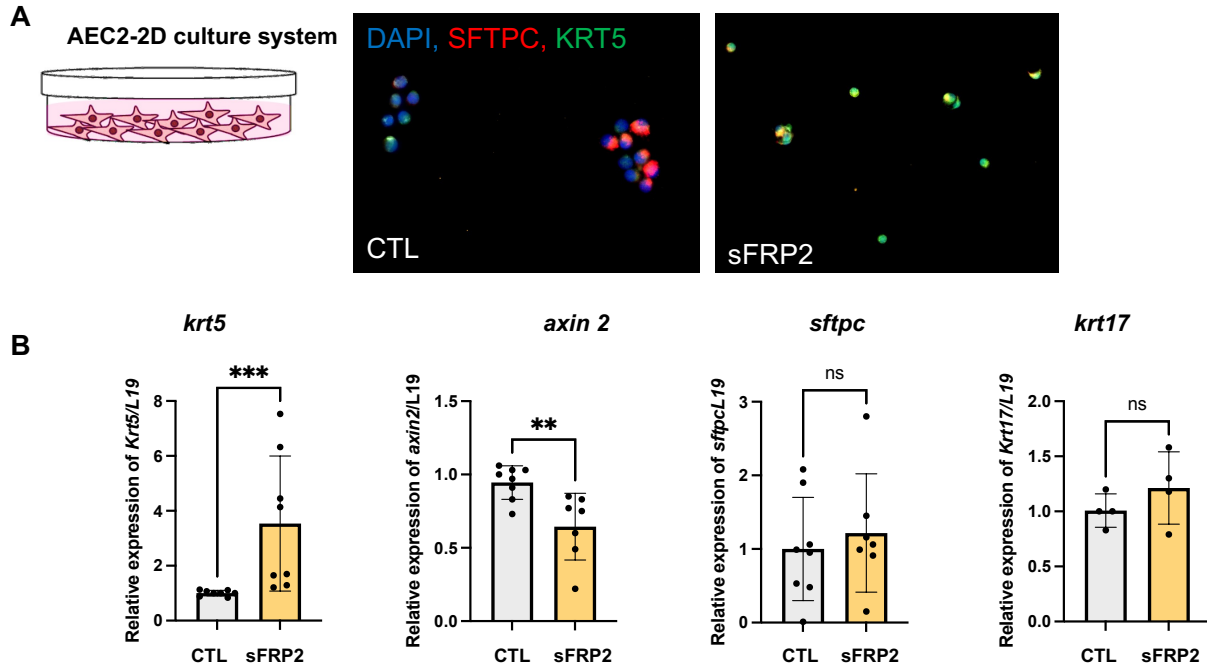

**Supplemental Figure 7.** (A) Immunofluorescence for SFTPC and KRT5 of AEC2-2D culture treated with sFRP2 ( $60 \text{ ng.ml}^{-1}$ ).  $n=3$  biological replicates. (B) Level of expression of *krt5*, *axin2*, *krt17*, and *sftpc* mRNA level in Epcam<sup>+</sup> cells isolated from 3-day culture of AEC2s-2D culture treated with sFRP2 ( $60 \text{ ng.ml}^{-1}$ ). at least 7 biological replicates. Statistical significance was determined by Mann Whitney t-test.

## Supplemental Tables

### Biopsy Patient Characteristics

|                                                         | <b>Biopsy EGCG</b> | <b>Biopsy Control</b>            |
|---------------------------------------------------------|--------------------|----------------------------------|
|                                                         | n = 4              | n=4                              |
| <b>Male sex, No. (%)</b>                                | 0 (0)              | 2 (50)                           |
| <b>Age, Mean (SD), years</b>                            | 61.5 (5.5)         | 62.8 (6.6)                       |
| <b>FEV1</b>                                             |                    |                                  |
| Mean (SD), L                                            | 2.18 (0.37)        | 2.78 (1.26)                      |
| Median (IQR), L                                         | 2.14 (1.89-2.44)   | 2.40 (1.95-3.23)                 |
| % Predicted value, mean (SD)                            | 80.7 (12.4)        | 88.8 (13.9)                      |
| <b>FVC</b>                                              |                    |                                  |
| Mean (SD), L                                            | 2.69 (0.59)        | 3.44 (1.40)                      |
| Median (IQR), L                                         | 2.67 (2.23-3.13)   | 3.04 (2.53-3.95)                 |
| % Predicted value, mean (SD)                            | 76.8 (15.4)        | 82.3 (11.1)                      |
| <b>FEV1/FVC, Mean (SD), %</b>                           | 81.9               | 79.7                             |
| <b>TLC</b>                                              |                    |                                  |
| Mean (SD), L                                            | 4.20 (1.26)        | 4.97 (1.31)                      |
| Median (IQR), L                                         | 3.78 (3.40-4.57)   | 4.46 (4.17-5.26)                 |
| % Predicted value, mean (SD)                            | 77.0 (21.4)        | 82.0 (3.9)                       |
| <b>Hgb-corrected Dlco, % predicted value, mean (SD)</b> | 65.0 (21.1)        | 66.5 (20.6)                      |
|                                                         |                    |                                  |
|                                                         |                    |                                  |
|                                                         |                    |                                  |
| <b>Patient</b>                                          | <b>Diagnosis</b>   | <b>Biopsy # (scRNA metadata)</b> |
| Control Biopsy 1                                        | Unclassifiable     | Biopsy 1                         |
| Control Biopsy 2                                        | UIP                | Biopsy 2                         |
| Control Biopsy 3                                        | NSIP               | Biopsy 6                         |
| Control Biopsy 4                                        | UIP                | Biopsy 7                         |
| EGCG Biopsy 1                                           | UIP + Nonspecific  | Biopsy 3                         |
| EGCG Biopsy 2                                           | cHP                | Biopsy 4                         |
| EGCG Biopsy 3                                           | UIP                | Biopsy 5                         |
| EGCG Biopsy 4                                           | UIP                | Biopsy 8                         |

Supplemental Table 1: Characteristics of patients who donated biopsy tissue, untreated and EGCG-treated.

Supplemental Table 2 and Supplemental Table 3 have been uploaded as Supplemental Data (excel files)

**Supplemental Table 4: Statistical significance related to Figure 5**

**4A: Statistical significance related to Figure 5B**

| <b>Tukey's multiple comparisons tes</b> | <b>Adjusted P Value</b> |
|-----------------------------------------|-------------------------|
|                                         |                         |
| <b>SFTPC+ /Krt5-</b>                    |                         |
| CTL vs. sFRP2 10                        | 0.9952                  |
| CTL vs. sFRP2 30                        | 0.0069                  |
| CTL vs. sFRP2 60                        | <0.0001                 |
| sFRP2 10 vs. sFRP2 30                   | 0.0101                  |
| sFRP2 10 vs. sFRP2 60                   | <0.0001                 |
| sFRP2 30 vs. sFRP2 60                   | 0.0526                  |
|                                         |                         |
| <b>SFTPC- /Krt5+</b>                    |                         |
| CTL vs. sFRP2 10                        |                         |
| CTL vs. sFRP2 30                        | 0.6919                  |
| CTL vs. sFRP2 60                        | <0.0001                 |
| sFRP2 10 vs. sFRP2 30                   | 0.8114                  |
| sFRP2 10 vs. sFRP2 60                   | <0.0001                 |
| sFRP2 30 vs. sFRP2 60                   | 0.0004                  |
|                                         |                         |
| <b>SFTPC+ /Krt5+</b>                    |                         |
| CTL vs. sFRP2 10                        | 0.9956                  |
| CTL vs. sFRP2 30                        | 0.0227                  |
| CTL vs. sFRP2 60                        | 0.501                   |
| sFRP2 10 vs. sFRP2 30                   | 0.0457                  |
| sFRP2 10 vs. sFRP2 60                   | 0.8876                  |
| sFRP2 30 vs. sFRP2 60                   | 0.0162                  |

**4B: Statistical significance related to Figure 5D**

| <b>Šídák's multiple comparisons test</b> | <b>Adjusted P Value</b> |
|------------------------------------------|-------------------------|
|                                          |                         |
| CTL - si sFRP2                           |                         |
| SFTPC+ /Krt5-                            | 0.0303                  |
| SFTPC+ /Krt5+                            | 0.001                   |
| SFTPC- /Krt5+                            | 0.226                   |

Supplemental Table 5: List of primers used for qPCR

| Target gene        | Forward                         | Reverse                        |
|--------------------|---------------------------------|--------------------------------|
| Human sFRP2        | CGA GGA AGC TCC AAA GGT ATG TGA | TCG GAC ACA CCG TTC AGC T      |
| Human Krt5         | GGA ATG CAG ACT CAG TGG AGA     | GCT GCT GGA GTA GTA GCT TCC    |
| Human Axin2        | TAC ACT CCT TAT TGG GCG ATC A   | TTG GCT ACT CGT AAA GTT TTG GT |
| Human Frizzled 5   | TGG AAC GCT TCC GCT ATC CTG A   | GGT CTC GTA GTG GAT GTG GTT G  |
| Human Frizzled6    | GGC AGT GTA TCT GAA AGT GCG C   | GAT GTG GAA CCT TTG AGG CTG C  |
| L19                | ATG TAT CAC AGC CTG TAC CTG     | TTC TTG GTC TCT TCC TCC TTG    |
| PPIA               | GCA TAC GGG TCC TGG CAT CT      | ACT TTG CCA AAC ACC ACA TGC T  |
| Human Periostin    | CGG GAC CAA GGC CCA AAT GT      | GCT GGG CAG CCT TTC ATT CTT    |
| Human Snail        | CTG AGG CCA AGG ATC TCC AG      | GAC AGG AGA AGG GCT TCT CG     |
| Human Collagen 1A2 | GTT GCT GCT TGC AGT AAC CTT     | AGG GCC AAG TCC AAC TCC TT     |
| Human p63          | GCC ATG CCC AGT ATG TAG AAG     | TCA TCC CTC CAA CAC AAC TG     |
| Human NGFR         | CCT CAT CCC TGT CTA TTG CTC C   | GTT GGC TCC TTG CTT GTT CTG C  |
| Human Krt19        | AGC TAG AGG TGA AGA TCC GCG A   | GCA GGA CAA TCC TGG AGT TCT C  |
| Human Krt17        | GGT GGG TGG TGA GAT CAA TGT     | CGC GGT TCA GTT CCT CTG TC     |
| Human SFRP1        | ATG CCA CCG AAG CCT CCA A       | GCA AAC TCG CTG GCA CAG A      |
| Human SFRP2        | CGA GGA AGC TCC AAA GGT ATG TGA | TCG GAC ACA CCG TTC AGC T      |
| Human SFRP3        | GCT ACA CAG AAG ACC TAT TTC CG  | CCG TGG AAT GTT TAC CAG AGA GG |
| Human SFRP4        | GTG GCG CTC AAG GAT GAT GCT     | AAC TGT TCT CCG CTG TTC CTG CA |
| Human SFRP5        | TGC TGC ACT GCC ACA AGT T       | GTG CTC CAT CTC ACA CTG GG     |
| Human PCKzeta      | GTT CTC CTG GTG CGG TTG AAG A   | GGT TGC TGG ATG CCT GCT CAA A  |

Supplemental Table 6: List of probes used for RNAscope and silencing gene expression

| Name of probe                    | Catalog Number | Dilution | Company |
|----------------------------------|----------------|----------|---------|
| RNAscope™ Probe- Hs-SFRP2        | 476341         | N/A      | ACD Bio |
| RNAscope™ Probe- Hs-SFTPC        | 452561         | 1:50     | ACD Bio |
| RNAscope™ Probe- Hs-KRT17        | 463661         | 1:50     | ACD Bio |
| RNAscope™ Probe- Hs-COL1A2       | 432721         | 1:50     | ACD Bio |
| Silencer Select Negative control | 4390846        |          | Ambion  |
| Silencer Select sFRP2            | 4392420 s12718 |          | Ambion  |
| Silencer Select Frizzled-5       | 4390824 s15416 |          | Ambion  |
| Silencer Select Frizzled-6       | s729           |          | Ambion  |

Supplemental Table 7: List of antibodies used for cell sorting FACS, western blot, and immunofluorescence.

Antibodies used for FACS analysis

| <b>Name</b>                   | <b>Catalog number</b> | <b>Company</b>  | <b>Dilution</b> |
|-------------------------------|-----------------------|-----------------|-----------------|
| live dead draq7               | 7406                  | Cell Signaling  |                 |
| CD45                          | 557833                | BD Biosciences  | 1:200           |
| CD31                          | 563653                | BD Biosciences  | 1:200           |
| CD11b                         | 557754                | BD Biosciences  | 1:200           |
| Epcam CD326                   | 324206                | BD Biosciences  | 1:200           |
| Ht-280                        | TB-27AHT2-280         | Terrace Biotech | 1:100           |
| Alexa Fluor 488 goat anti IGM | A21042                | Invitrogen      | 1:1000          |

Antibodies used for Immunofluorescence

| <b>Name</b>                                     | <b>Catalog number</b> | <b>Company</b>           | <b>Dilution</b> |
|-------------------------------------------------|-----------------------|--------------------------|-----------------|
| Anti-Prosurfactant Protein C (proSP-C) Antibody | AB3786                | Millipore                | 1:2500          |
| Cytokeratin 17 (E-4)                            | sc393002              | Santa Cruz Biotechnology | 1 to 500        |
| Keratin 5 (Poly9059)                            | 95904                 | Biolegend                | 1 to 500        |

Antibodies used for Western Blot

| <b>Name</b>     | <b>Catalog number</b> | <b>Company</b>           | <b>Dilution</b> |
|-----------------|-----------------------|--------------------------|-----------------|
| KRT5            | MA5-15347             | Fisher Scientific        | 1:1000          |
| KRT17           | sc-39300              | Santa Cruz Biotechnology | 1:100           |
| Periostin       | sc-398631             | Santa Cruz Biotechnology | 1:100           |
| Pro-SFTPC       | AB3786                | Millipore Sigma          | 1:1000          |
| sFRP2           | MA5-79985             | Fisher Scientific        | 1:1000          |
| b-Actin         | A5441                 | Sigma-Aldrich            | 1:5000          |
| FZD5            | MA5-17080             | ThermoFisher             | 1:500           |
| NFATC3          | sc-8405               | Santa Cruz Biotechnology | 1:200           |
| GAPDH           | sc-47724              | Santa Cruz Biotechnology | 1:200           |
| NUP62           | 13916-1-AP            | ThermoFisher             | 1:1000          |
| Fibronectin     | F3648                 | Sigma Aldrich            | 1:500           |
| Snail1          | 3895                  | Cell Signaling           | 1:1000          |
| Smad3           |                       |                          | 1:1000          |
| pSmad3          |                       |                          | 1:1000          |
| Phosphotyrosine |                       |                          |                 |
