# Supplementary material for: A fibroblast-dependent TGF-β1/sFRP2 noncanonical Wnt signaling axis promotes epithelial metaplasia in idiopathic pulmonary fibrosis
Source: PubMed Central journal article supplement (PMC11405054; doi:10.1172/jci174598), 2024-07-09

Full unedited gel Fig 4F  
Anti-Periostin Antibody  
Anti-Pro-Spc Antibody  
Anti-K17 Antibody  
Anti-sFRP2 Antibody  
Anti-bActin Antibody

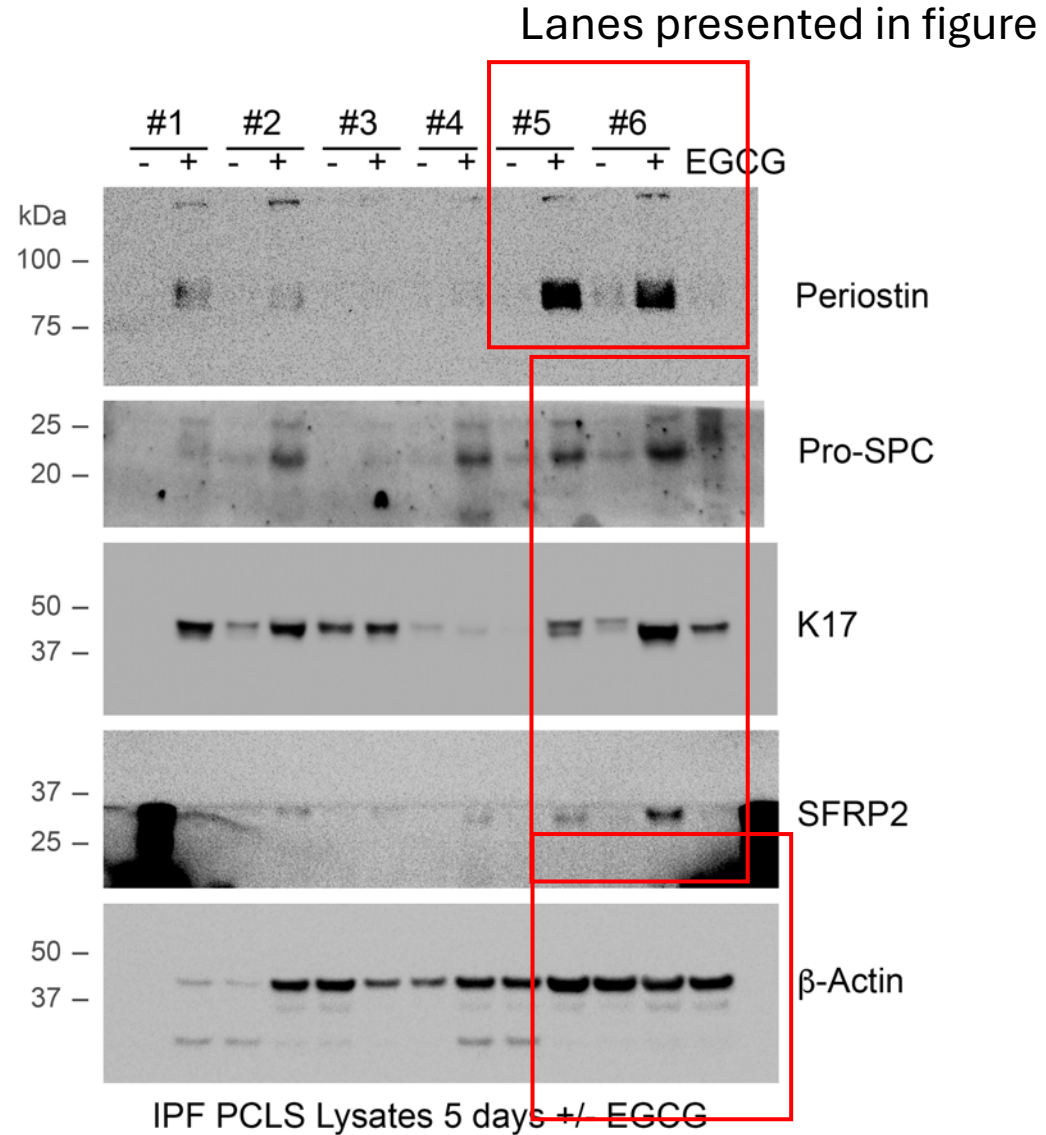

Full unedited gel for Supplem Fig 5C

Anti-Periostin Antibody

Anti-Pro-Spc Antibody

Anti-K17 Antibody

Anti-sFRP2 Antibody

Anti-bActin Antibody

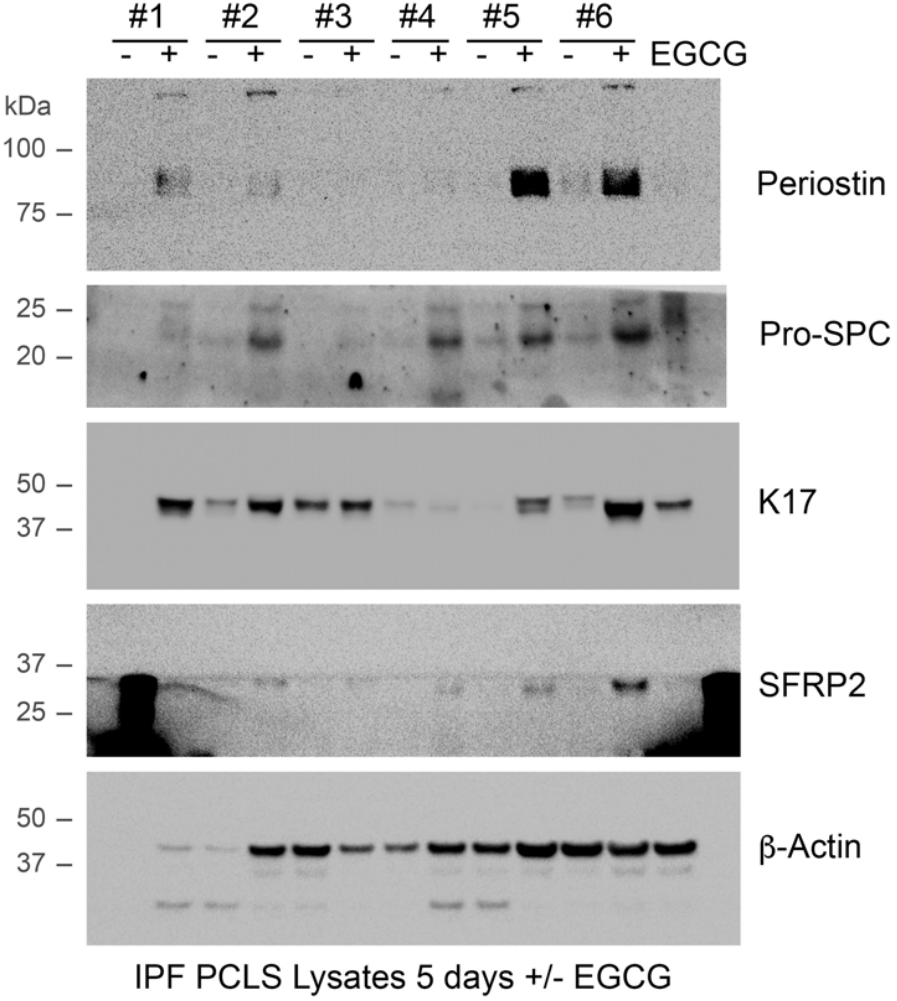

Full unedited gel for Fig 5G  
Anti-Keratin 5 antibody  
Anti-Keratin 17 antibody  
Anti-bActin antibody

Lanes presented in figure

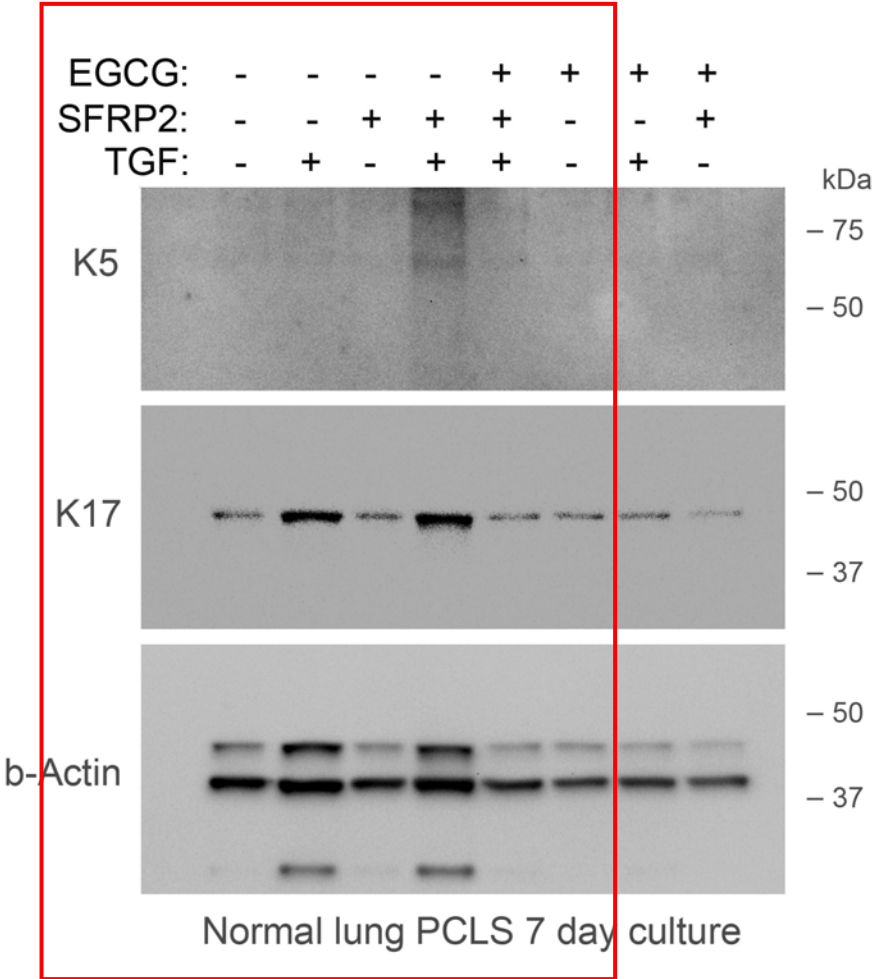

Full unedited gel for Supplem Fig 6A  
Anti-Keratin 5 antibody  
Anti-Keratin 17 antibody  
Anti-bActin antibody

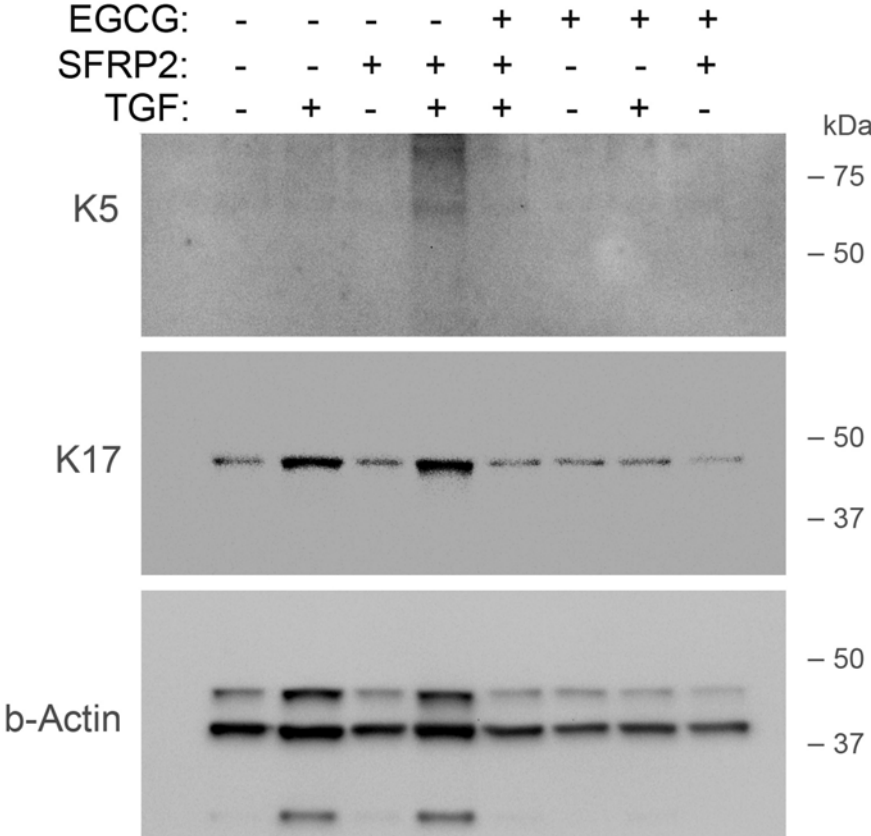

Normal lung PCLS 7 day culture

Full unedited gel for Fig 6F  
 Anti-NFATC3 antibody  
 Anti-FZD5 antibody  
 Anti-GAPDH antibody  
 Anti-NUP62

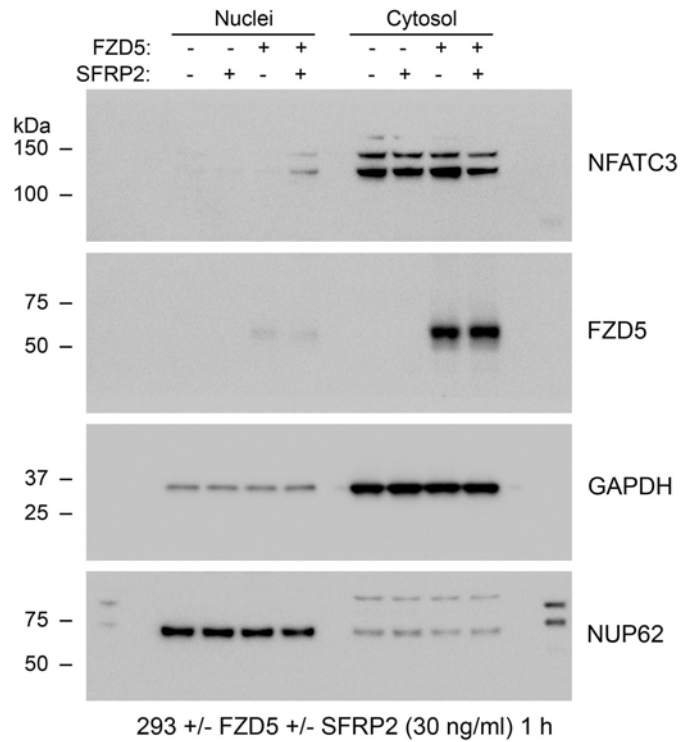

Blot#1

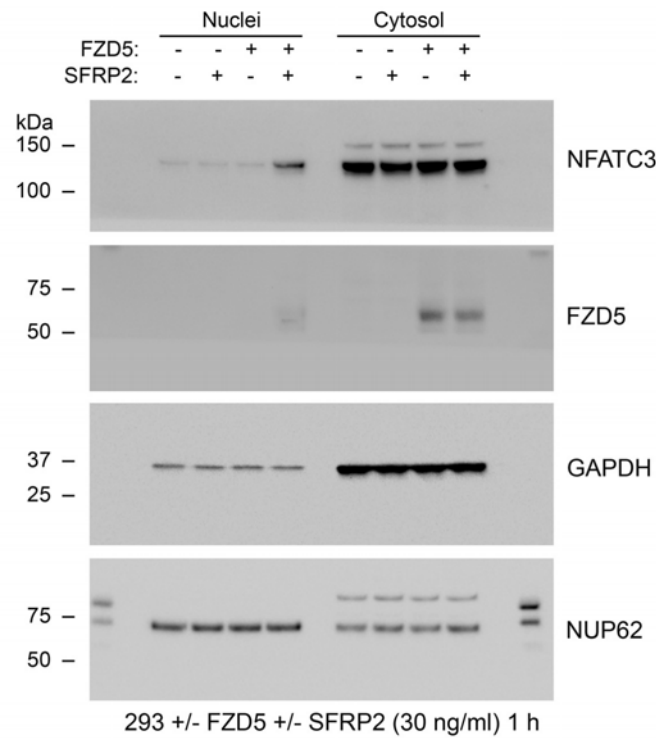

Blot#2

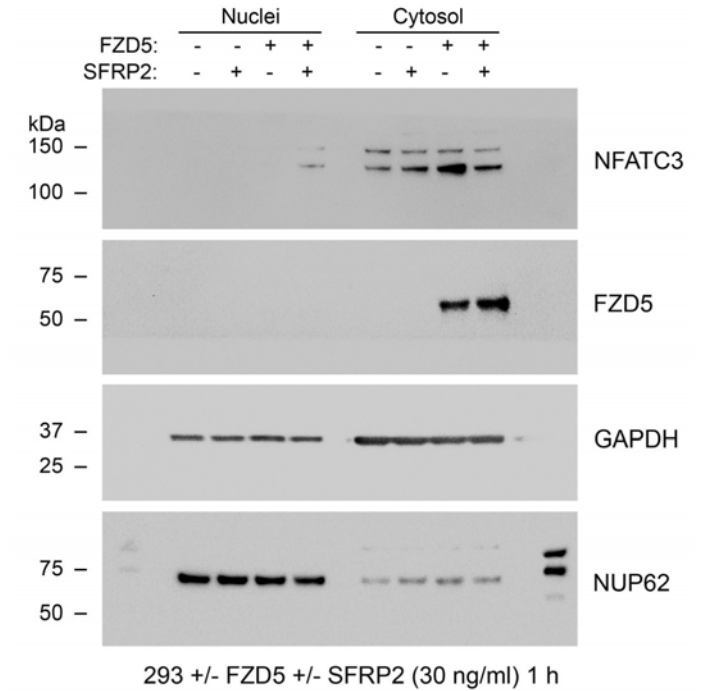

Blot#3

Blot presented in Fig 5F

Full unedited gel for Supplem Fig 1B

Anti-Fibronectin antibody

Anti-Collagen I antibody

Anti-Snail antibody

Anti- $\beta$ Actin antibody

Anti-pSmad3 antibody

Anti-Smad3 antibody

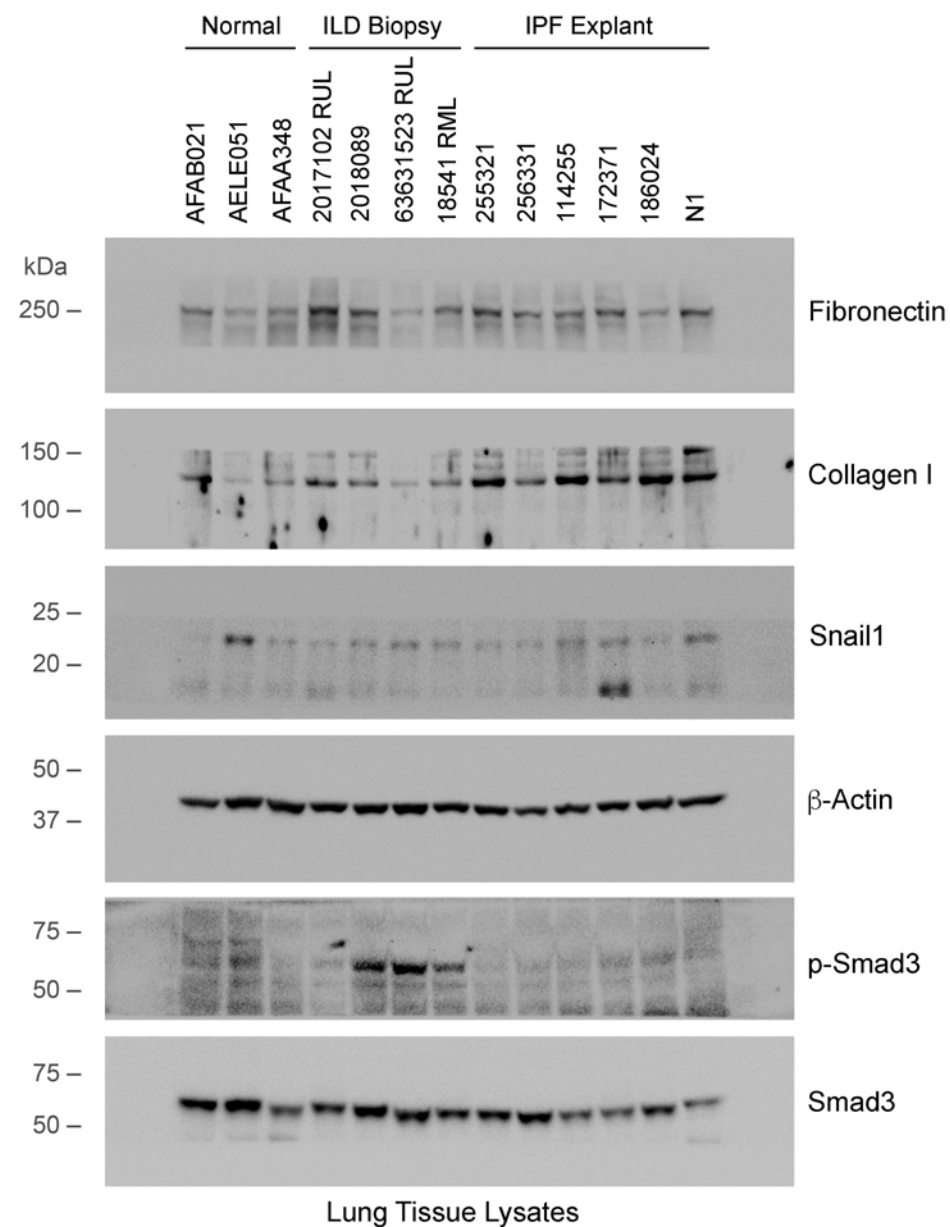

Full unedited gel for Supplem Fig 1D  
pan-phosphotyrosine antibody

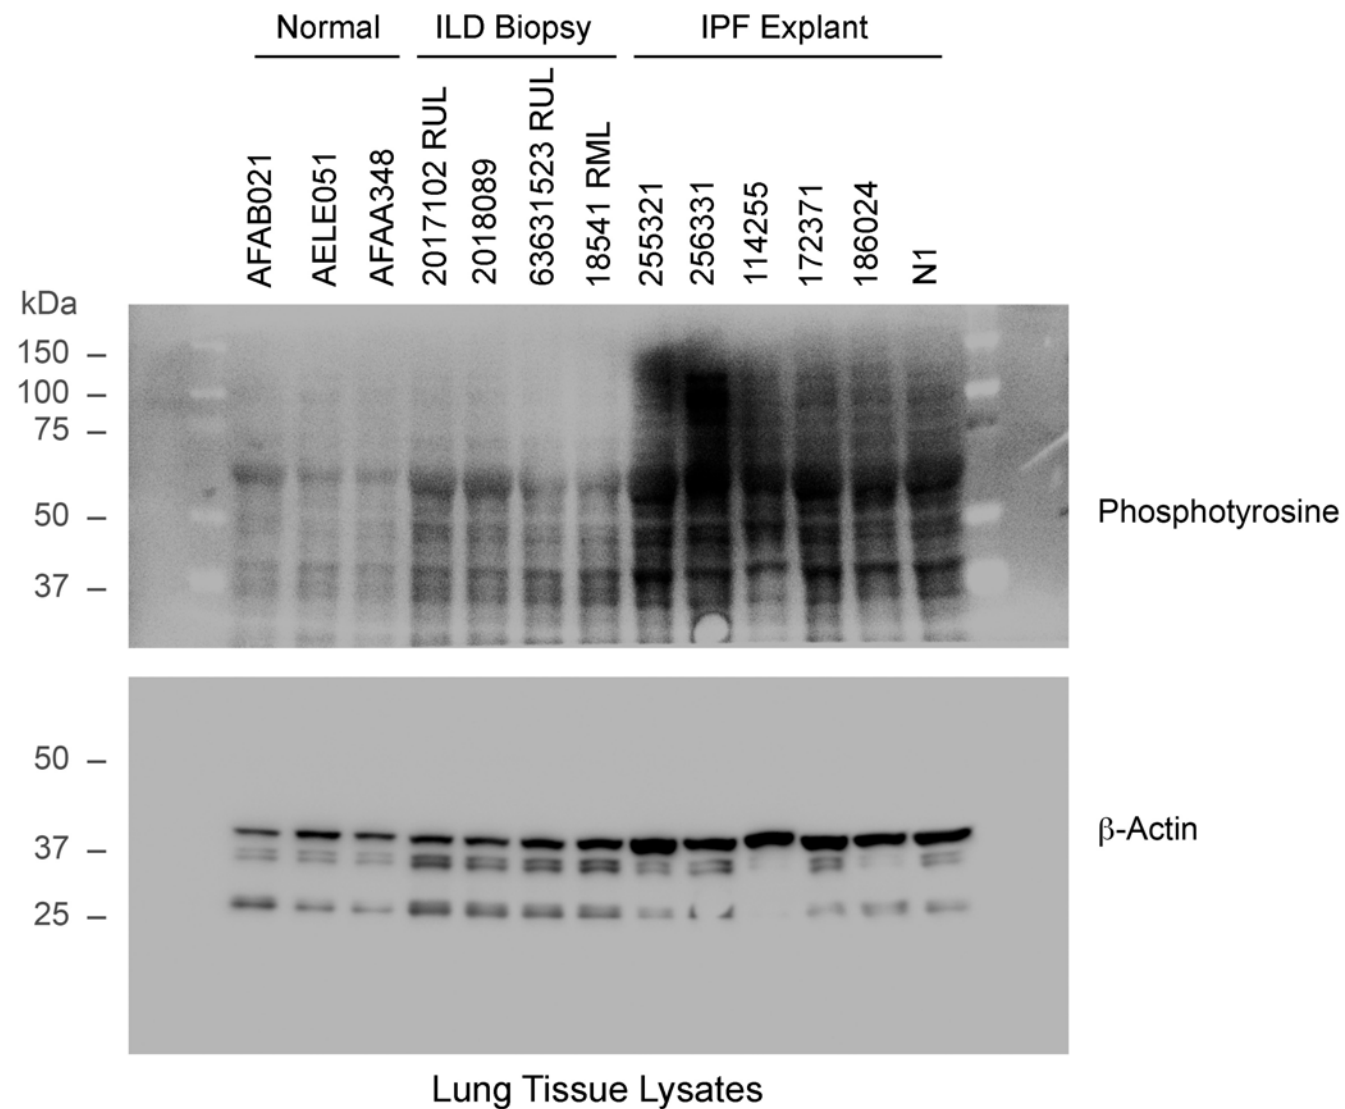

Supplement: jci-134-174598-s222.pdf [file jci-134-174598-s222.pdf]
